# Supplementary material
Source: publisher figshare collection journal article supplement (https://asha.figshare.com/articles/dataset/_/10870958)
Supplement: Supplementary file 1 [file 1]

**Supplemental Table S2.** Discourse probe stimuli.

| <b>AV-1</b>                                                      | <b>AV-2</b>                                                        | <b>AV-3</b>                                                         |
|------------------------------------------------------------------|--------------------------------------------------------------------|---------------------------------------------------------------------|
| <b>Procedural Discourse</b>                                      | <b>Procedural Discourse</b>                                        | <b>Procedural Discourse</b>                                         |
| Tell me in detail how you would go about feeding chickens.       | Tell me in detail how you would go about feeding the dogs.         | Tell me in detail how you would go about planting a garden.         |
| Tell me in detail how you would go about shaving.                | Tell me in detail how you would go about getting ready for church. | Tell me in detail how you would go about getting ready for the day. |
| Tell me in detail how you would go about buying a new car.       | Tell me in detail how you would go about buying new glasses.       | Tell me in detail how you would go about buying food at the store.  |
| Tell me in detail how you would go about making a sandwich.      | Tell me in detail how you would go about making a sandwich.        | Tell me in detail how you would go about making a sandwich.         |
| Tell me in detail how you would go about packing for a trip.     | Tell me in detail how you would go about packing for a trip.       | Tell me in detail how you would go about packing for a trip.        |
|                                                                  |                                                                    |                                                                     |
| <b>Requests for Personal Information</b>                         | <b>Requests for Personal Information</b>                           | <b>Requests for Personal Information</b>                            |
| Tell me in detail about one of your neighbors.                   | Tell me in detail about one of your neighbors.                     | Tell me in detail about one of your neighbors.                      |
| Tell me in detail about one of your hobbies.                     | Tell me in detail about one of your hobbies.                       | Tell me in detail about one of your hobbies.                        |
| Tell me in detail about one of your family members.              | Tell me in detail about one of your family members.                | Tell me in detail about one of your family members.                 |
| Tell me in detail about your favorite movie or TV show.          | Tell me in detail about your favorite movie or TV show.            | Tell me in detail about your favorite movie or TV show.             |
| Tell me in detail about a fun trip you went on or want to go on. | Tell me in detail about a fun trip you went on or want to go on.   | Tell me in detail about a fun trip you went on or want to go on.    |
