# Supplementary material
Source: publisher figshare collection journal article supplement (https://asha.figshare.com/articles/dataset/_/10870958)
Supplement: Supplementary file 2 [file 1]

**Supplemental Table S3.** Sentence production scoring rubric.

| Score                                                                                                                                                                                                                                                                                                                                                                                         | Criteria                                                                                                                                                          |
|-----------------------------------------------------------------------------------------------------------------------------------------------------------------------------------------------------------------------------------------------------------------------------------------------------------------------------------------------------------------------------------------------|-------------------------------------------------------------------------------------------------------------------------------------------------------------------|
| +1                                                                                                                                                                                                                                                                                                                                                                                            | Appropriate verb but with errors (i.e., inflectional; semantic or phonemic paraphasia; not used as main verb) (do not penalize "articulation," e.g., distortions) |
| +2                                                                                                                                                                                                                                                                                                                                                                                            | Appropriate verb without any errors (do not penalize "articulation," e.g., distortions)                                                                           |
| +1                                                                                                                                                                                                                                                                                                                                                                                            | One to two "generic," weak arguments (subject or object) in any sentence location                                                                                 |
| +1                                                                                                                                                                                                                                                                                                                                                                                            | One strong argument (subject or object) any location                                                                                                              |
| +2                                                                                                                                                                                                                                                                                                                                                                                            | Two strong arguments (subject and object) any location                                                                                                            |
| +1                                                                                                                                                                                                                                                                                                                                                                                            | 1 to 2 plausible and likely open class modifiers (adjectives or adverbs) of the arguments ( <i>new jeep</i> , etc.)                                               |
| +1                                                                                                                                                                                                                                                                                                                                                                                            | 1 to 2 additional open class words (adjectives, nouns, verbs, adverbs), not counting the subject and object arguments ( <i>Yesterday</i> , ...)                   |
| +2                                                                                                                                                                                                                                                                                                                                                                                            | 3 or more plausible and likely open class modifiers (adjectives or adverbs) of the arguments                                                                      |
| +2                                                                                                                                                                                                                                                                                                                                                                                            | 3 or more additional open class words (adjectives, nouns, verbs, adverbs), not counting the subject and object arguments                                          |
| +1                                                                                                                                                                                                                                                                                                                                                                                            | No unnecessary words                                                                                                                                              |
| +2                                                                                                                                                                                                                                                                                                                                                                                            | All included words in correct location                                                                                                                            |
|                                                                                                                                                                                                                                                                                                                                                                                               | Total score                                                                                                                                                       |
| <p><i>Note.</i> A strong argument = noun or pronoun with strong relationship to verb; a specific person or thing or appropriate complex clause (e.g., subject or object cleft); <i>I</i> or <i>me</i>.<br/> A weak argument = noun or pronoun weak relationship to verb and/or pronouns (except count <i>I</i> and <i>me</i> as strong arguments), or generic words like "lady" or "man."</p> |                                                                                                                                                                   |
