# Supplementary material
Source: publisher figshare collection journal article supplement (https://asha.figshare.com/articles/dataset/_/10870958)
Supplement: Supplementary file 4 [file 1]

| DOER | ACTION | OBJECT | OTHER |
|------|--------|--------|-------|
| 1    |        |        |       |
| 2    |        |        |       |
| 3    |        |        |       |

**Supplemental Figure S1.** Sentence frame for treatment.
