# Supplementary material
Source: publisher figshare collection journal article supplement (https://asha.figshare.com/articles/dataset/_/10870958)
Supplement: Supplementary file 7 [file 1]

**Supplemental Table S1.** Verb stimuli lists for sentence production probes.

| List                                             | Target     | Concreteness<br>rating* | Frequency** |
|--------------------------------------------------|------------|-------------------------|-------------|
| Abstract verbs<br>list 1 (Set A1)                | affect     | 1.93                    | 10.65       |
|                                                  | prevent    | 2.34                    | 13.02       |
|                                                  | recommend  | 1.74                    | 14          |
|                                                  | ignore     | 2.22                    | 18.65       |
|                                                  | solve      | 2.1                     | 19.53       |
|                                                  | deserve    | 1.69                    | 43.75       |
|                                                  | blame      | 2.06                    | 52.27       |
| Abstract verbs<br>list 2 (Set A2)                | require    | 2.07                    | 10.65       |
|                                                  | advise     | 2.03                    | 12.22       |
|                                                  | represent  | 2.12                    | 15.12       |
|                                                  | confirm    | 2.15                    | 14.39       |
|                                                  | manage     | 2                       | 21.51       |
|                                                  | settle     | 2.31                    | 41.84       |
|                                                  | forgive    | 1.92                    | 76.53       |
| Abstract verbs<br>list 3 (Set A3)                | demand     | 2.2                     | 11.14       |
|                                                  | discover   | 2.37                    | 12.04       |
|                                                  | earn       | 2.39                    | 15.35       |
|                                                  | guarantee  | 1.96                    | 16.61       |
|                                                  | prepare    | 2.36                    | 33.53       |
|                                                  | suggest    | 1.8                     | 39.29       |
|                                                  | appreciate | 2.23                    | 85.76       |
| Concrete verbs<br>for generalization<br>(Set C1) | raise      | 3.8                     | 48.47       |
|                                                  | skip       | 4.07                    | 17.86       |
|                                                  | crash      | 3.79                    | 17.08       |
|                                                  | rip        | 3.79                    | 14.43       |
|                                                  | cook       | 4.32                    | 27.41       |
|                                                  | lock       | 4.65                    | 34.06       |
|                                                  | burn       | 4.11                    | 46.71       |

Note. \*Brysbaert et al. (2014)

\*\*Brysbaert & New (2009): SUBTLEX  
(freq\_dom\_pos\_per\_million\_words)

## References

- Brysbaert, M., & New, B. (2009). Moving beyond Kucera and Francis: A critical evaluation of current word frequency norms and the introduction of a new and improved word frequency measure for American English. *Behavior Research Methods*, 41(4), 977–990.
- Brysbaert, M., Warriner, A. B., & Kuperman, V. (2014). Concreteness ratings for 40 thousand generally known English word lemmas. *Behavior Research Methods*, 46(3), 904–911. <https://doi.org/10.3758/s13428-013-0403-5>
