# Supplementary material
Source: publisher figshare collection journal article supplement (https://asha.figshare.com/articles/dataset/_/10870958)

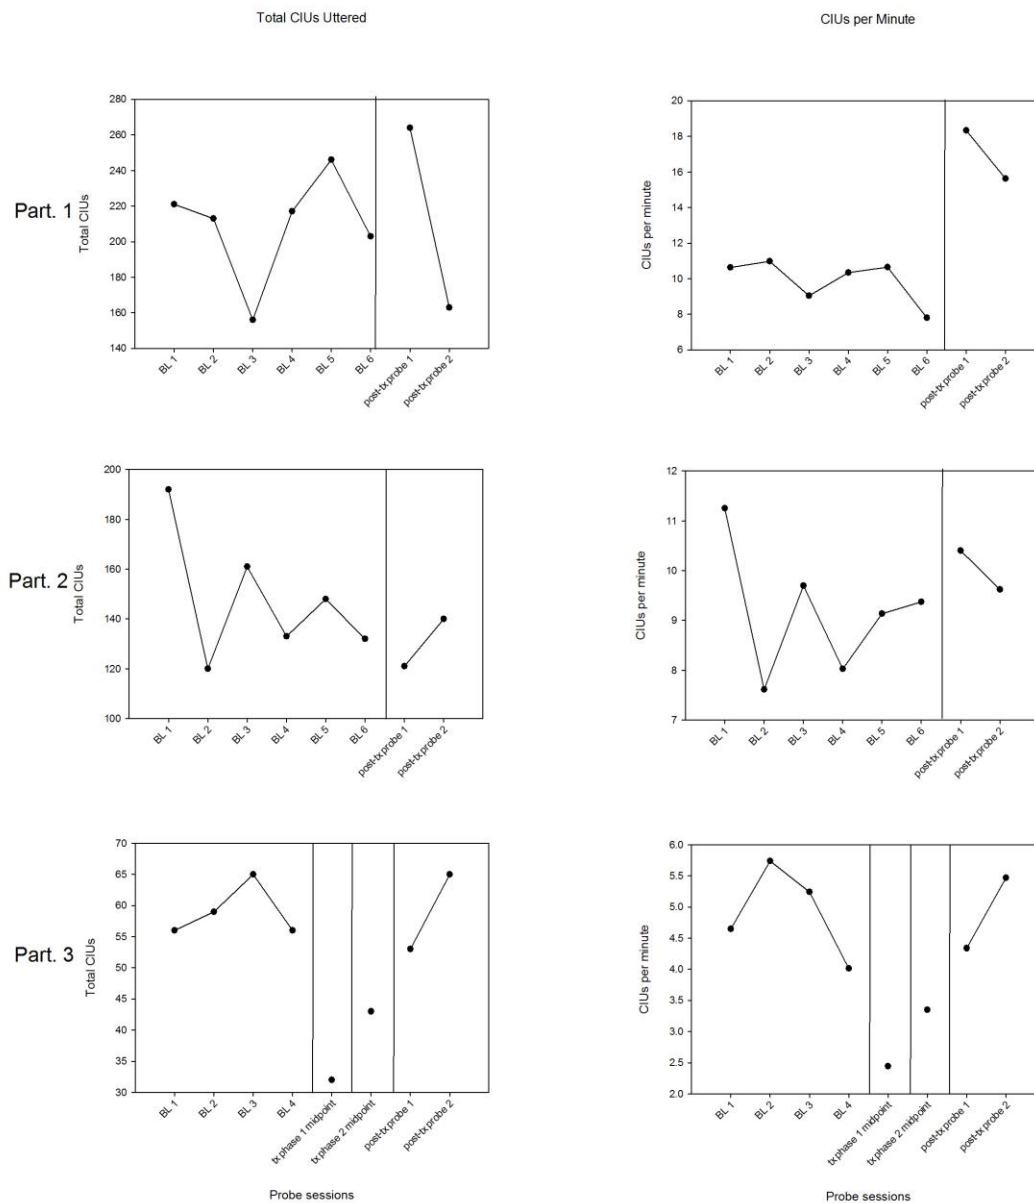

**Supplemental Figure S3.** Participants 1–3 discourse generalization probe performance.

Supplement: Supplementary file 5 [file 1]

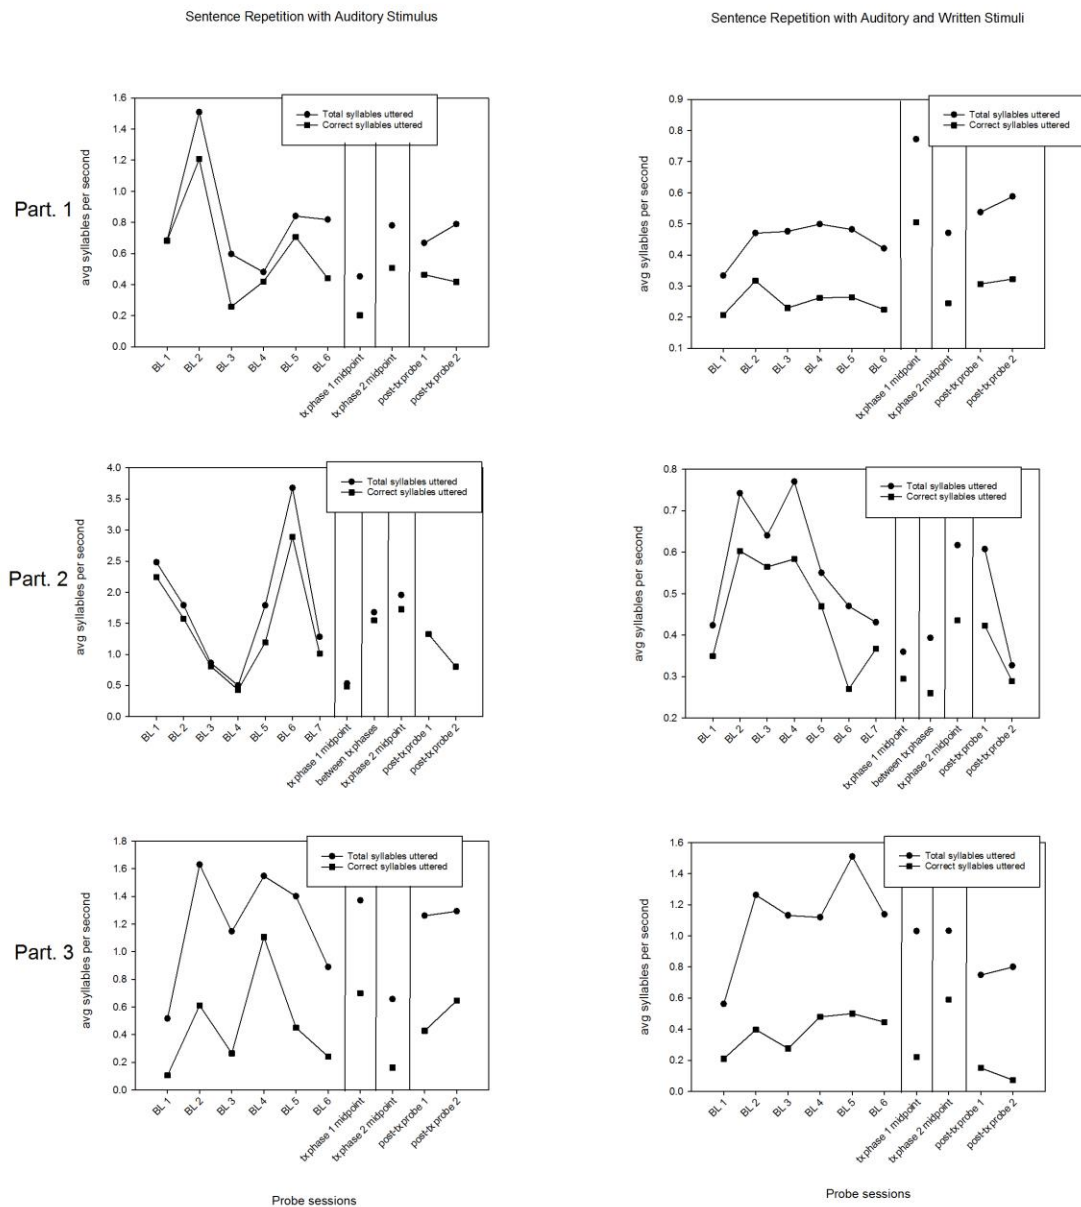

**Supplemental Figure S2.** Participants 1–3 sentence repetition probe performance.

Supplement: Supplementary file 6 [file 1]
